# Supplementary material
Source: publisher site journal article supplement (https://www.spandidos-publications.com/3840/downloadSupplementary)

Figure S1. Forest plots indicating the distinguishing value of the included studies. (A) Funnel plot of datasets. Publication bias was detected in the present investigation. (B) Deek's funnel plot asymmetry test;  $1/\text{root(ESS)}$  means the inverse root of the ESS. (C) Pooled sensitivity and specificity of the included studies. (D) Pooled positive DLR and negative DLR of the included studies. (E) Pooled diagnostic score and diagnostic odds ratio of the included studies. SMD, standard mean deviation; ESS, effective sample sizes; df, degrees of freedom; DLR, diagnostic likelihood ratio.

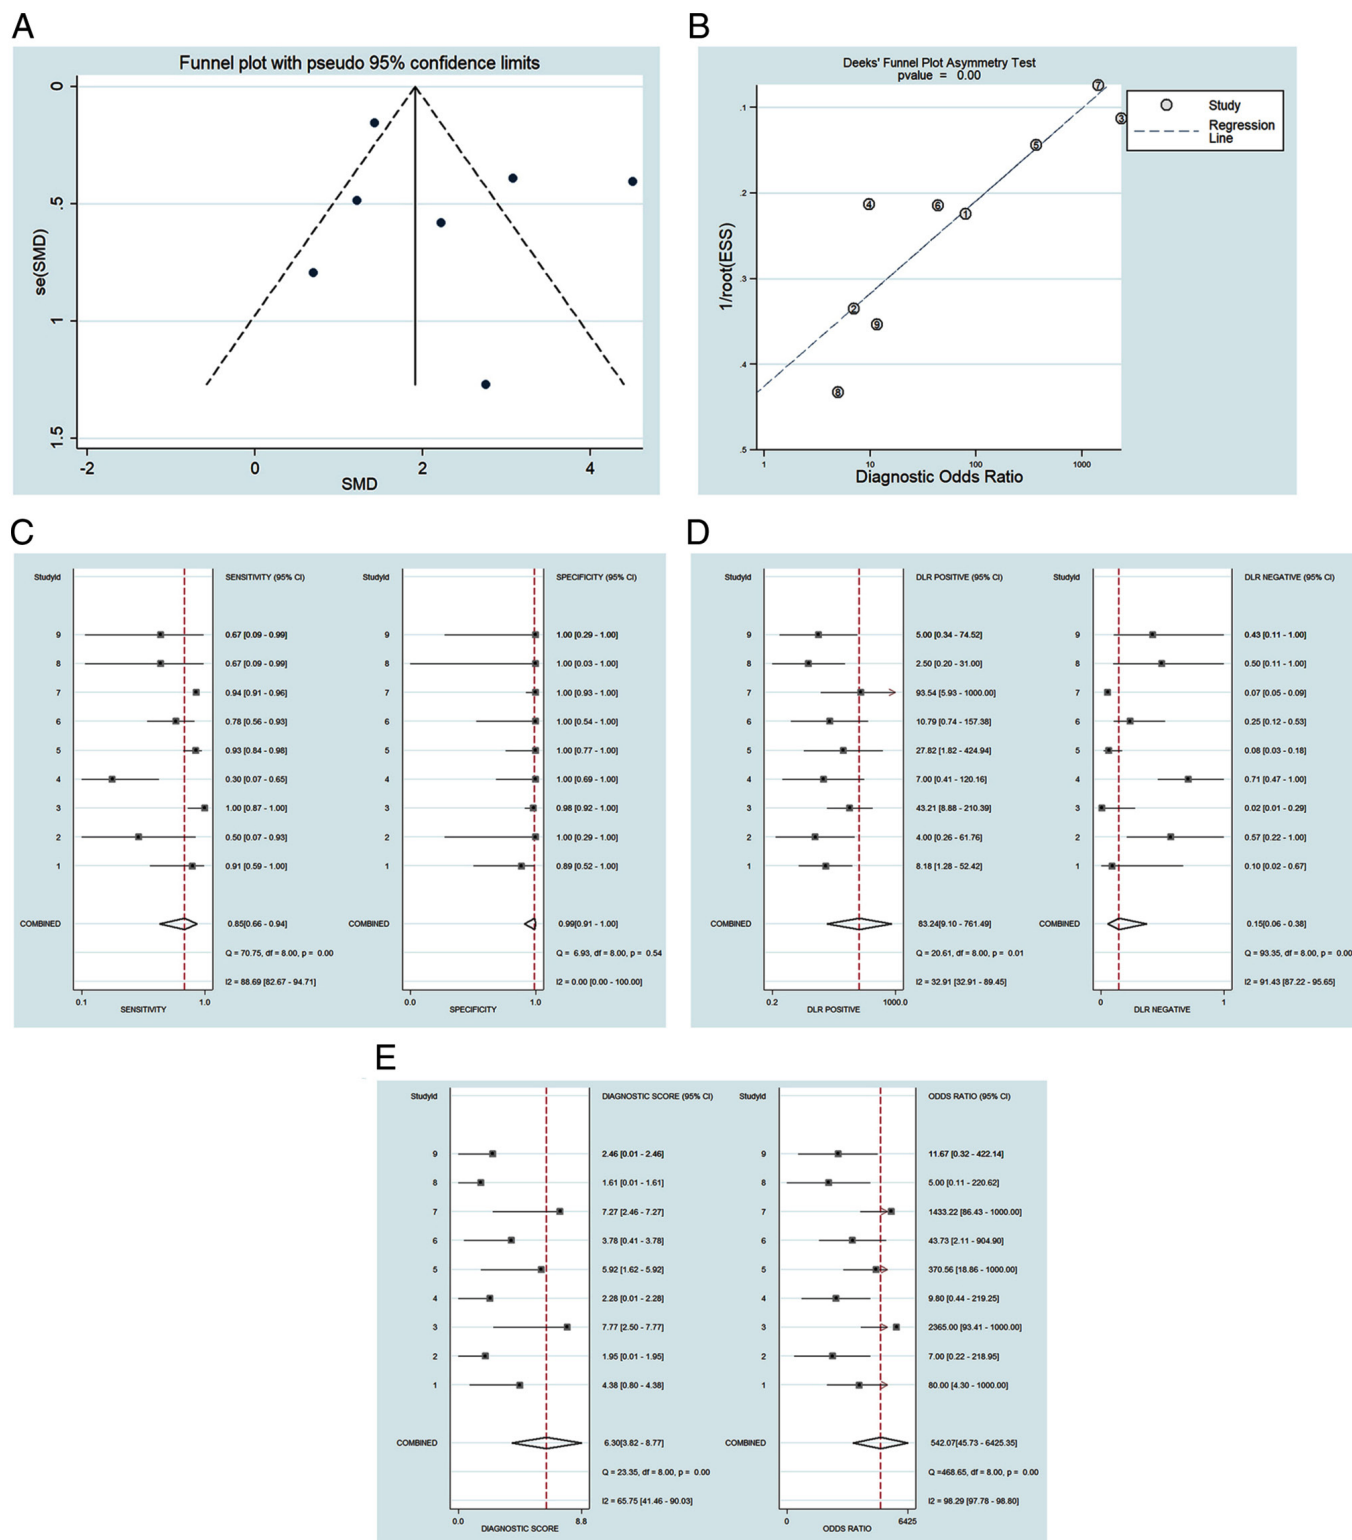

Figure S2. Clinical significance of CENPA in LUSC based on the TCGA and GEPIA databases. (A) Differential expression of CENPA between LUSC and noncancerous lung tissue based on the TCGA database; (B) Differential expression of CENPA between LUSC and noncancerous lung tissue based on the GEPIA database; (C) Positive correlation between BBOX1-AS1 and CENPA based on the TCGA database; (D) Positive correlation between BBOX1-AS1 and CENPA based on the GEPIA database. \* $P < 0.05$ . TCGA, The Cancer Genome Atlas; LUSC, lung squamous cell carcinoma; BBOX1-AS1,  $\gamma$ -butyrobetaine hydroxylase 1 antisense 1; CENPA, centromere protein A; GEPIA, gene expression profiling interactive analysis; TPM, transcripts per kilobase of exon model per million mapped reads.

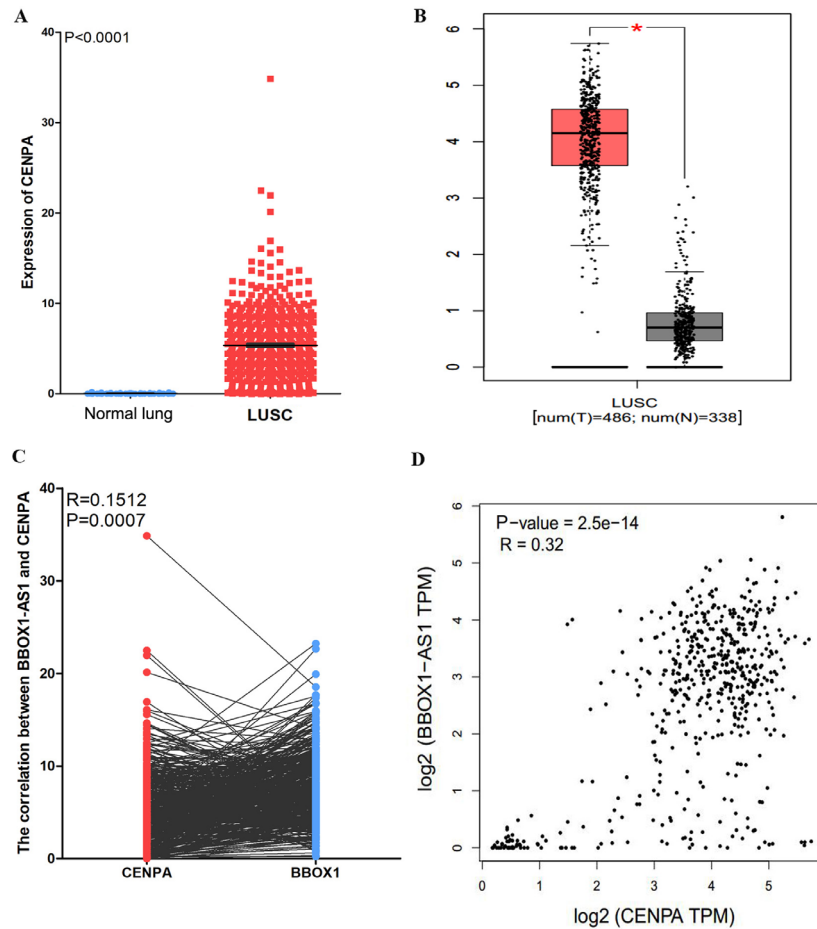

Supplement: Supplementary file 1 [file downloadSupplementary]
